# Supplementary material for: Effect of Phytopreparations Based on Bioreactor-Grown Cell Biomass of Dioscorea deltoidea, Tribulus terrestris and Panax japonicus on Carbohydrate and Lipid Metabolism in Type 2 Diabetes Mellitus
Source: MDPI journal article supplement (doi:10.3390/nu13113811), 2021-10-26
Supplement: s1 [file s1]

**Supplementary Table 1.** UPLC-ESI-MS data for the extract of *Panax japonicus* cell culture grown in bioreactors (recorded in positive ion mode). The analysis was performed using Waters Acquity UPLC-ESI-MS system (Waters, USA) as described in [29].

| Retention time, min | [M+H] <sup>+</sup> <i>m/z</i> | Other ions <i>m/z</i>                                      | Triterpene glycoside        |
|---------------------|-------------------------------|------------------------------------------------------------|-----------------------------|
| 3.61                | 801.5                         | 783.5; 765.5; 621.4<br>603.4; 585.4; 441.3<br>423.3; 405.3 | ginsenoside Rg1             |
| 4.02                | 887.5                         | 869.5; 707.4; 689.4<br>671.4; 621.4; 441.4<br>423.4; 405.3 | malonyl-ginsenoside Rg1     |
| 5.17                | 801.5                         | 783.5; 765.5; 747.5<br>621.4; 441.4; 423.4                 | ginsenoside Rf              |
| 6.03                | 1109.6                        | 1091.6; 947.6; 929.5<br>785.5; 425.4                       | ginsenoside Rb1             |
| 6.31                | 1195.6                        | 1177.6; 1015.5; 853.5;<br>425.4                            | malonyl-ginsenoside Rb1     |
| 6.45                | 957.5                         | 795.4; 777.4; 633.4<br>439.3                               | ginsenoside R0              |
| 6.78                | 1079.6                        | 1061.6; 899.5; 767.5<br>755.5; 749.5                       | ginsenoside Rb2/Rb3         |
| 7.00                | 1165.6                        | 1147.6; 985.5; 853.5<br>407.4                              | malonyl-ginsenoside Rb2/Rb3 |
| 7.38                | 795.5                         | 633.4; 615.4; 439.3                                        | chikusetsusaponin IVa       |
| 7.57                | 947.5                         | 929.5; 767.5; 749.5<br>605.4; 425.4                        | ginsenoside Rd              |
| 7.99                | 1033.6                        | 853.5; 835.5; 425.4<br>407.4                               | malonyl-ginsenoside Rd      |

**Supplementary Figure 1.** Industrial scale bioreactors: 630-l (550 l working volume) bubble-type bioreactors of 1T series (CUC “EBEE”, Yoshkar-Ola, Russia) with air supply through ring-type gas distributor  $\varnothing$  750 mm

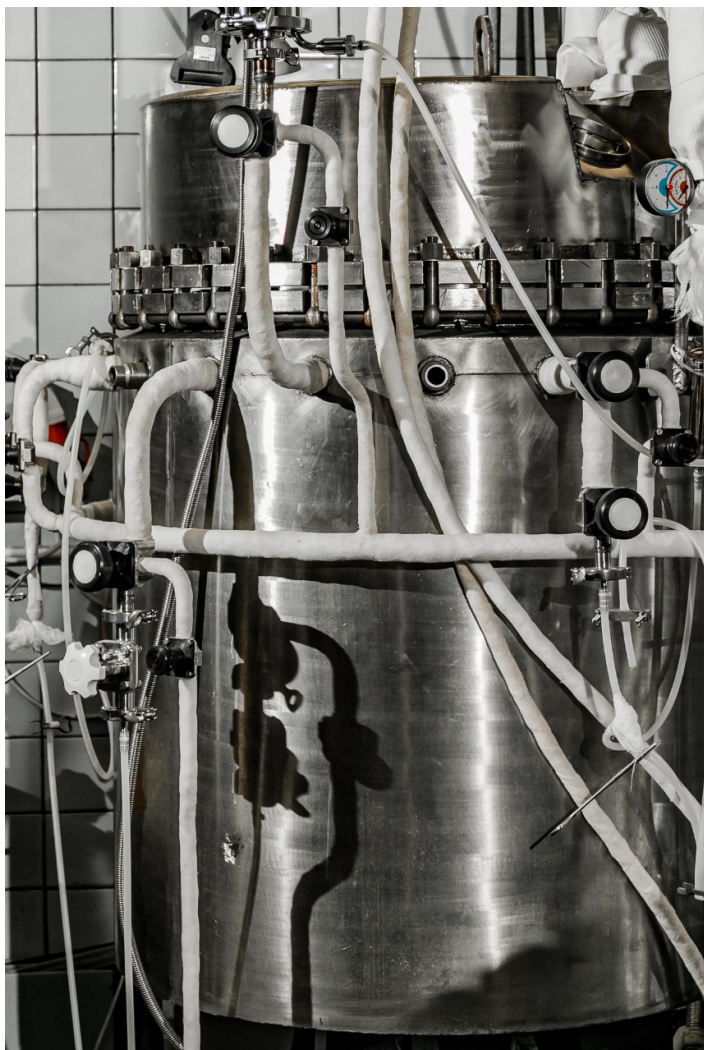

**Supplementary Figure 2.** Two observations of weakly expressed pathology in the liver of the intact animals. **(a)** minor granulomatous hepatitis, **(b)** scattered hepatocytes degeneration. Hematoxylin and eosin staining. Magnitude x400.

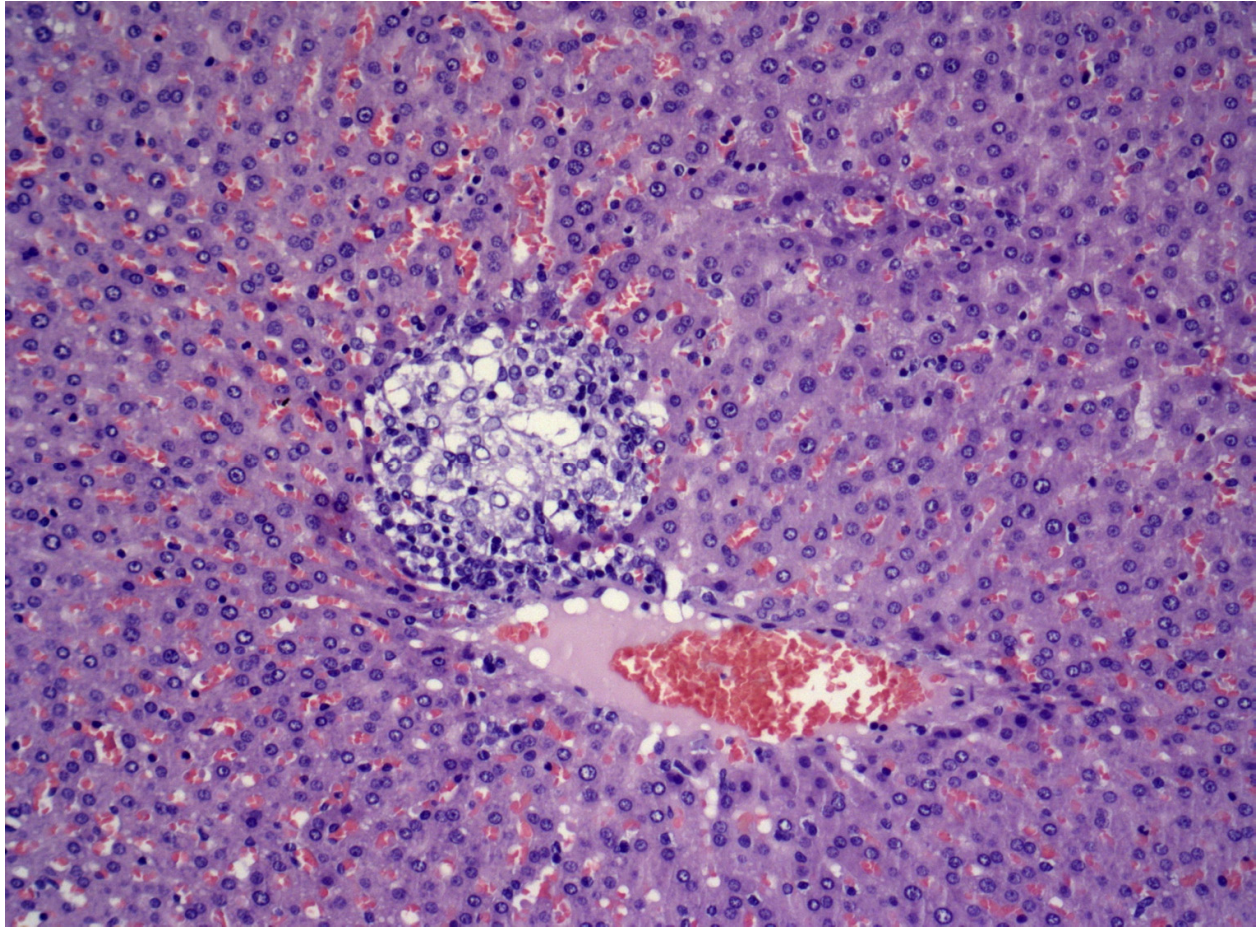

**Supplementary Figure 2a**

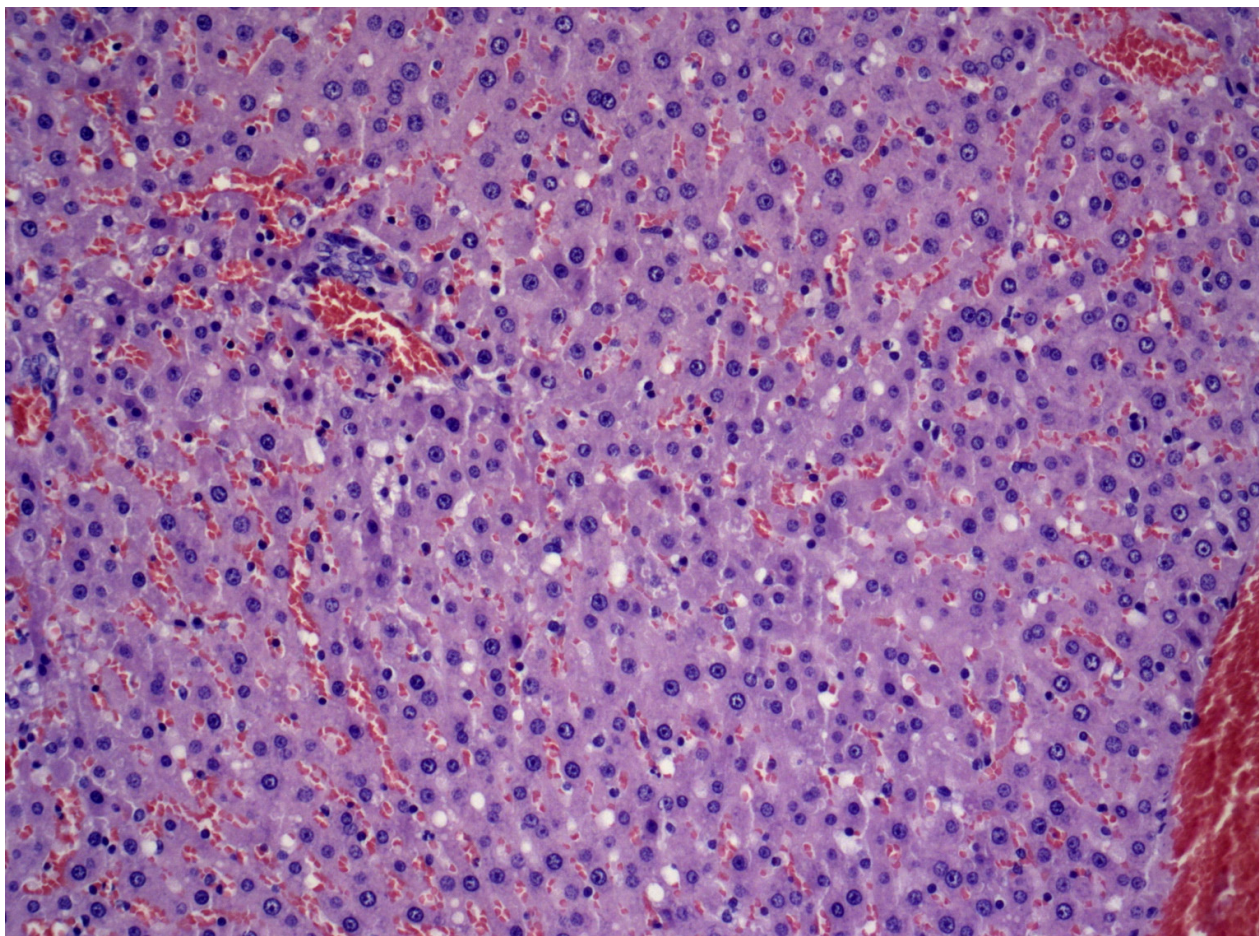

Supplementary Figure 2b

**Supplementary Figure 3.** Occasionally observed large lipid droplets with hepatocyte degeneration in the liver of rats in the STZ – induced model of type 2 diabetes mellitus that received treatments with phytopreparations of **(a)** *D. deltoidea* and **(b)** *T. terrestris*. Hematoxylin and eosin staining. Magnification x400.

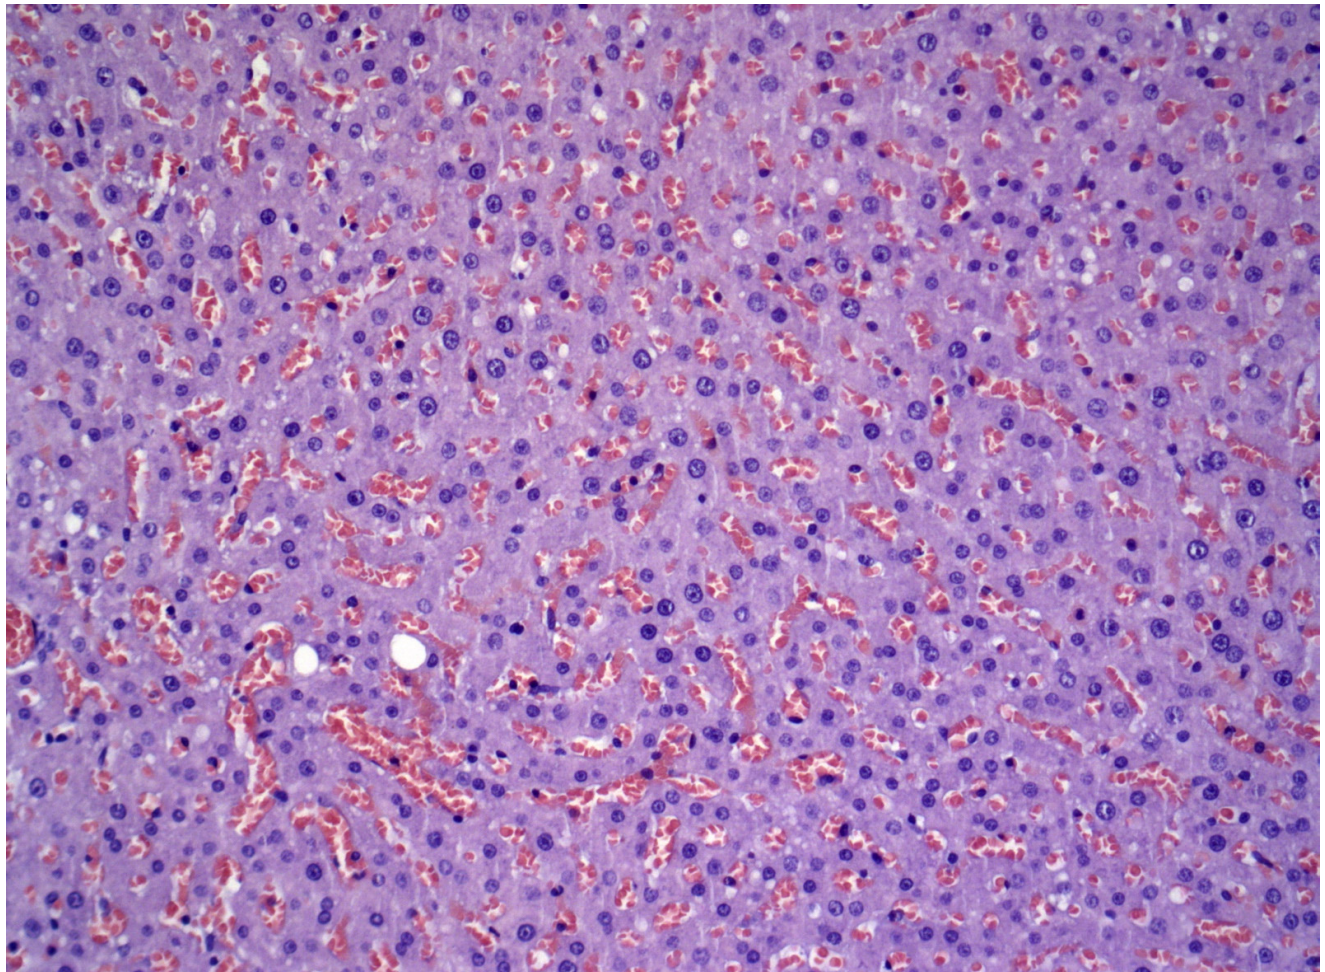

**Supplementary Figure 3a**

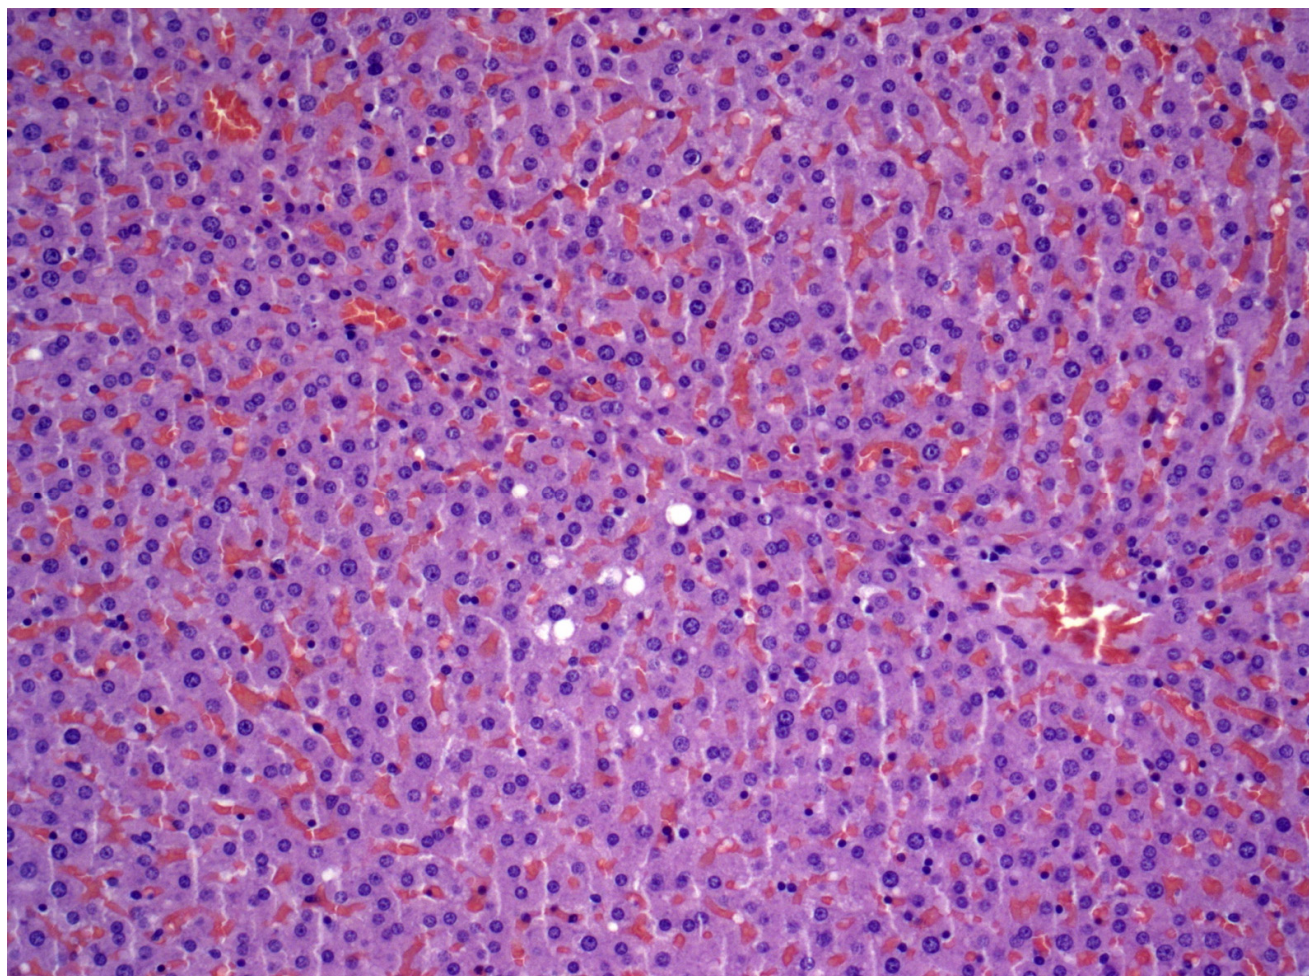

Supplementary Figure 3b

**Supplementary Figure 4.** Various pathologies observed during histological examination in animals of the control group in the STZ – induced model of type 2 diabetes mellitus that received sodium chloride (diabetes without treatment): **(a, b)** Medium and small lipid droplets with hepatocyte degeneration, **(c)** large and medium lipid droplets with hepatocyte regeneration, **(d)** total autolysis of kidney tissue, **(e)** partial autolysis of the pancreas, kidneys, spleen, and lung, **(f, g)** hepatocyte degeneration. Hematoxylin and eosin staining. Magnitude x400.

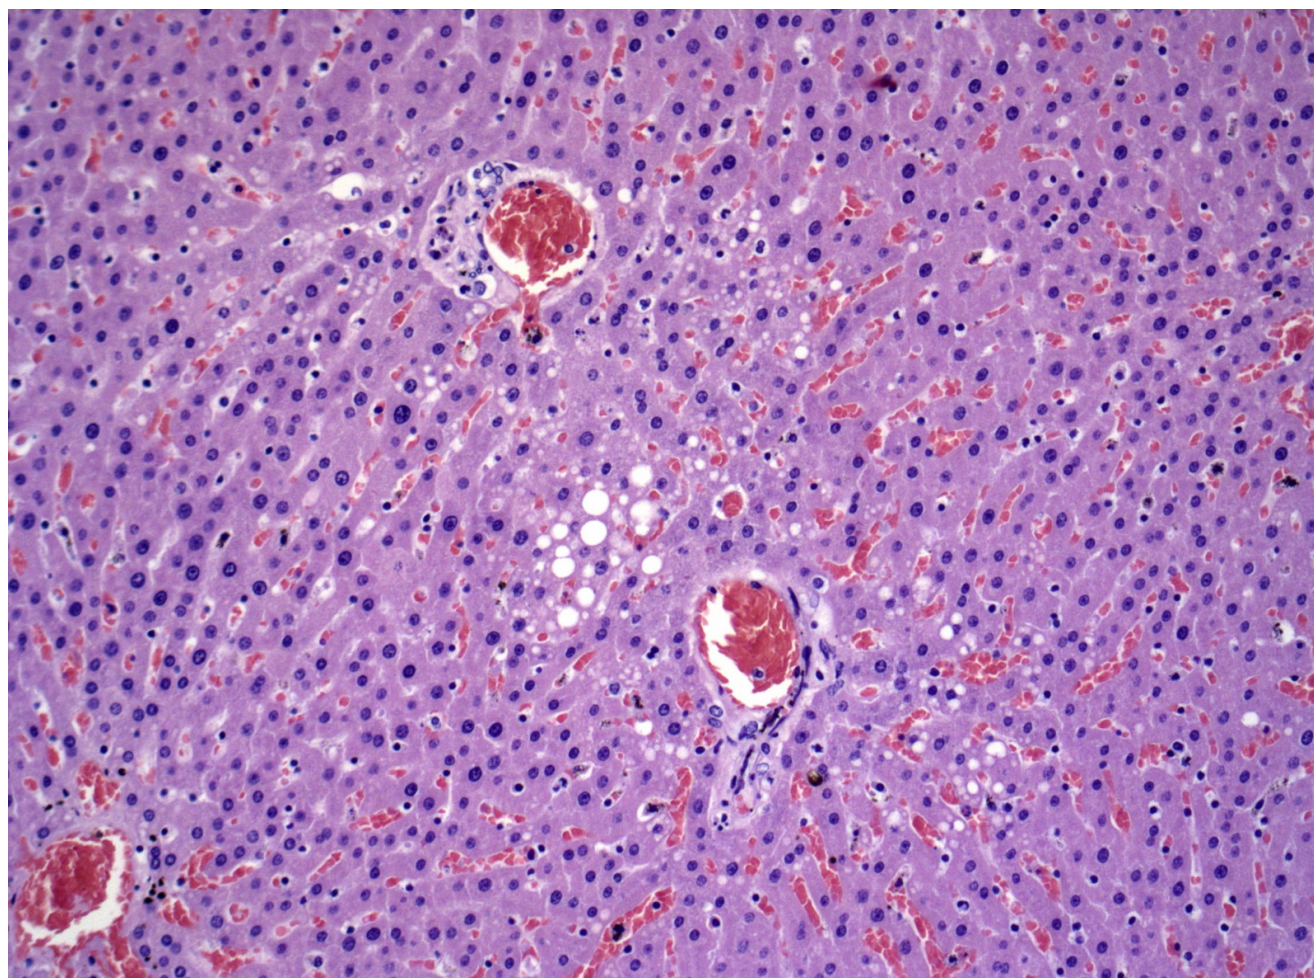

Supplementary Figure 4a

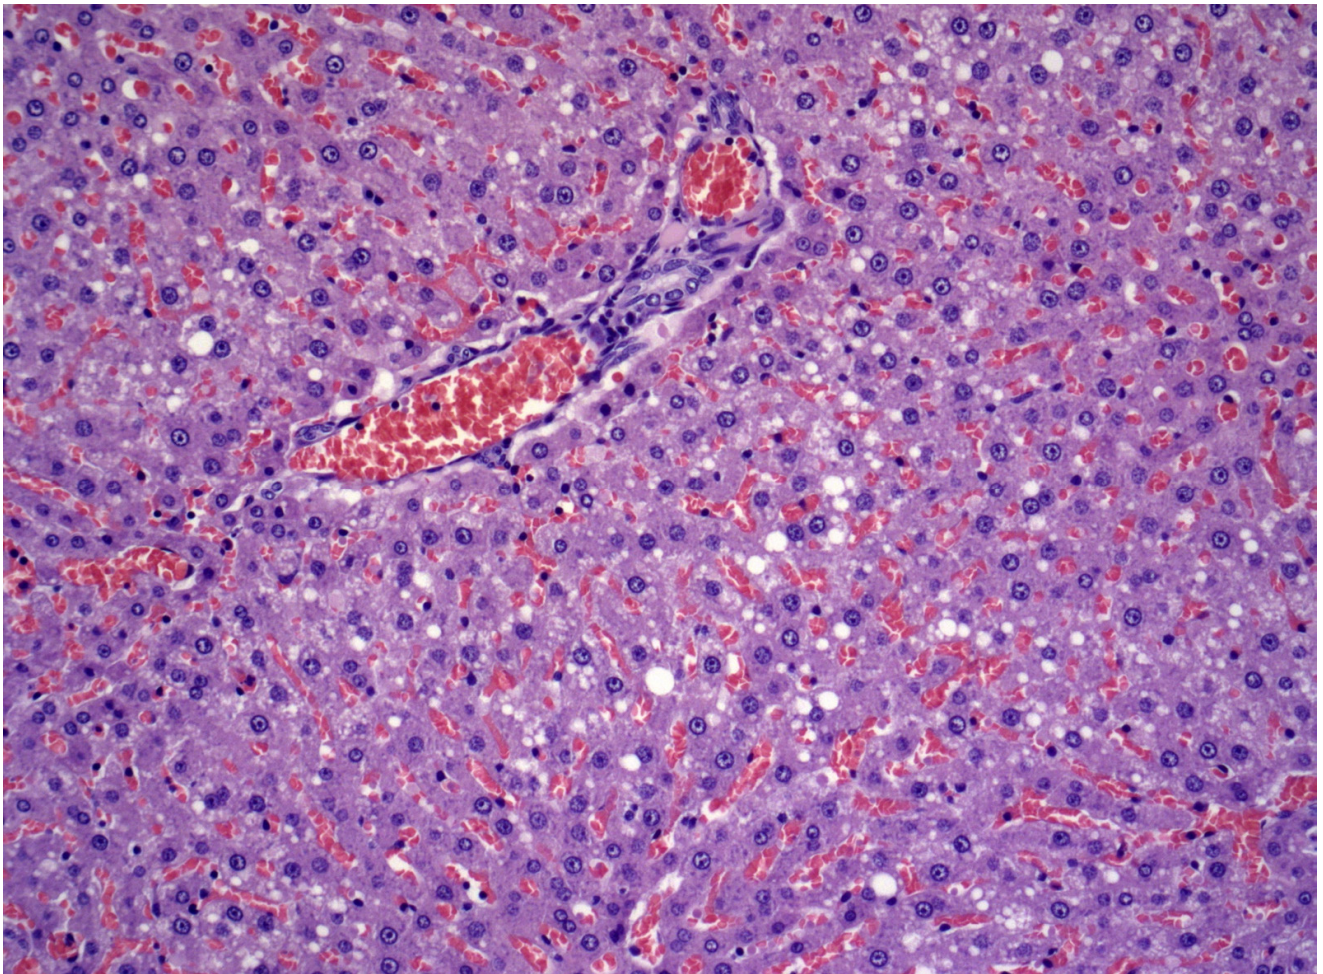

Supplementary Figure 4b

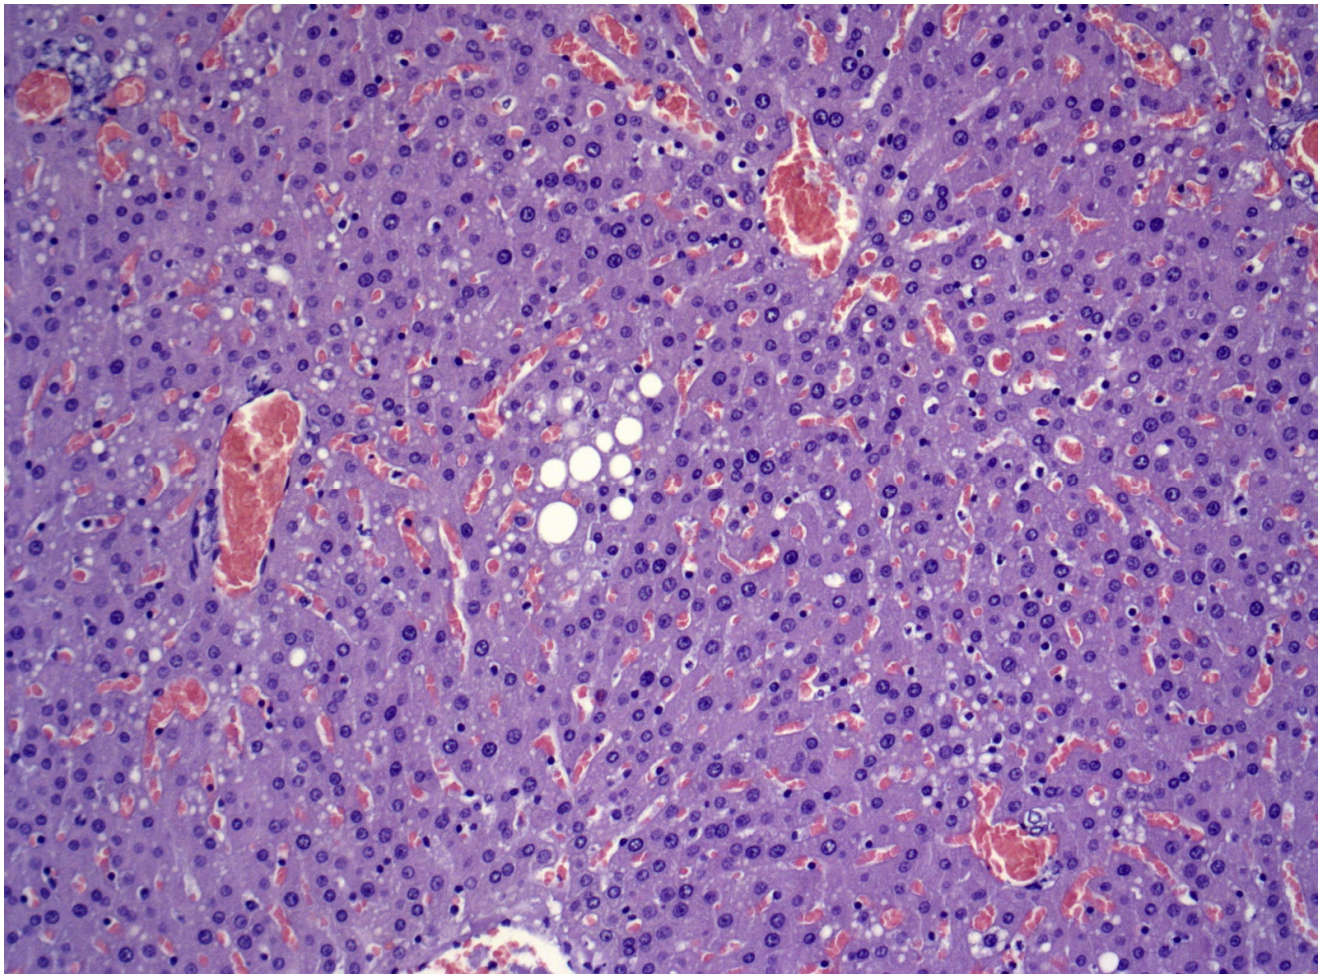

Supplementary Figure 4c

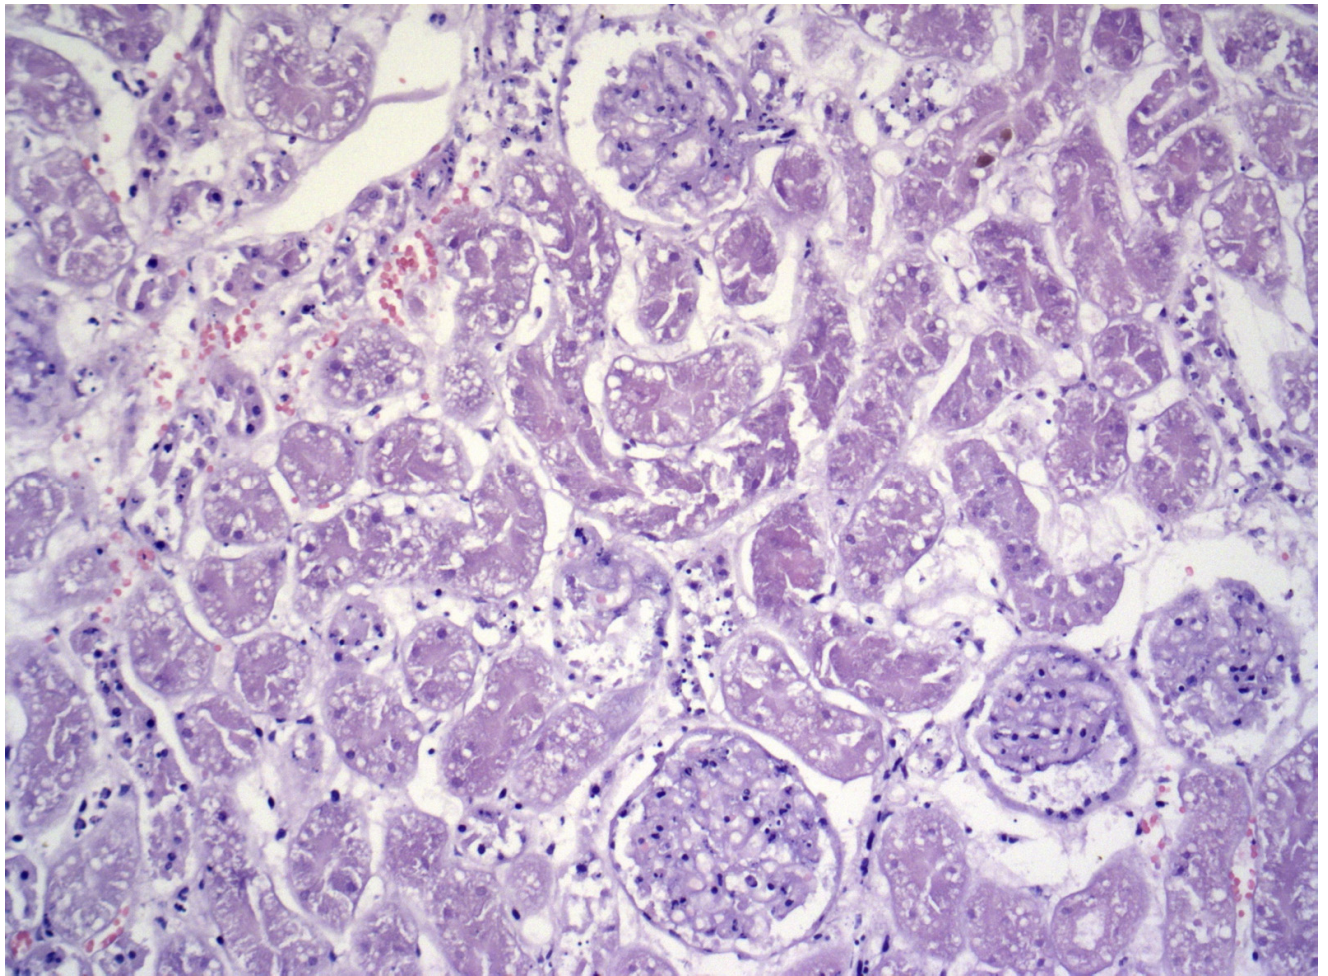

Supplementary Figure 4d

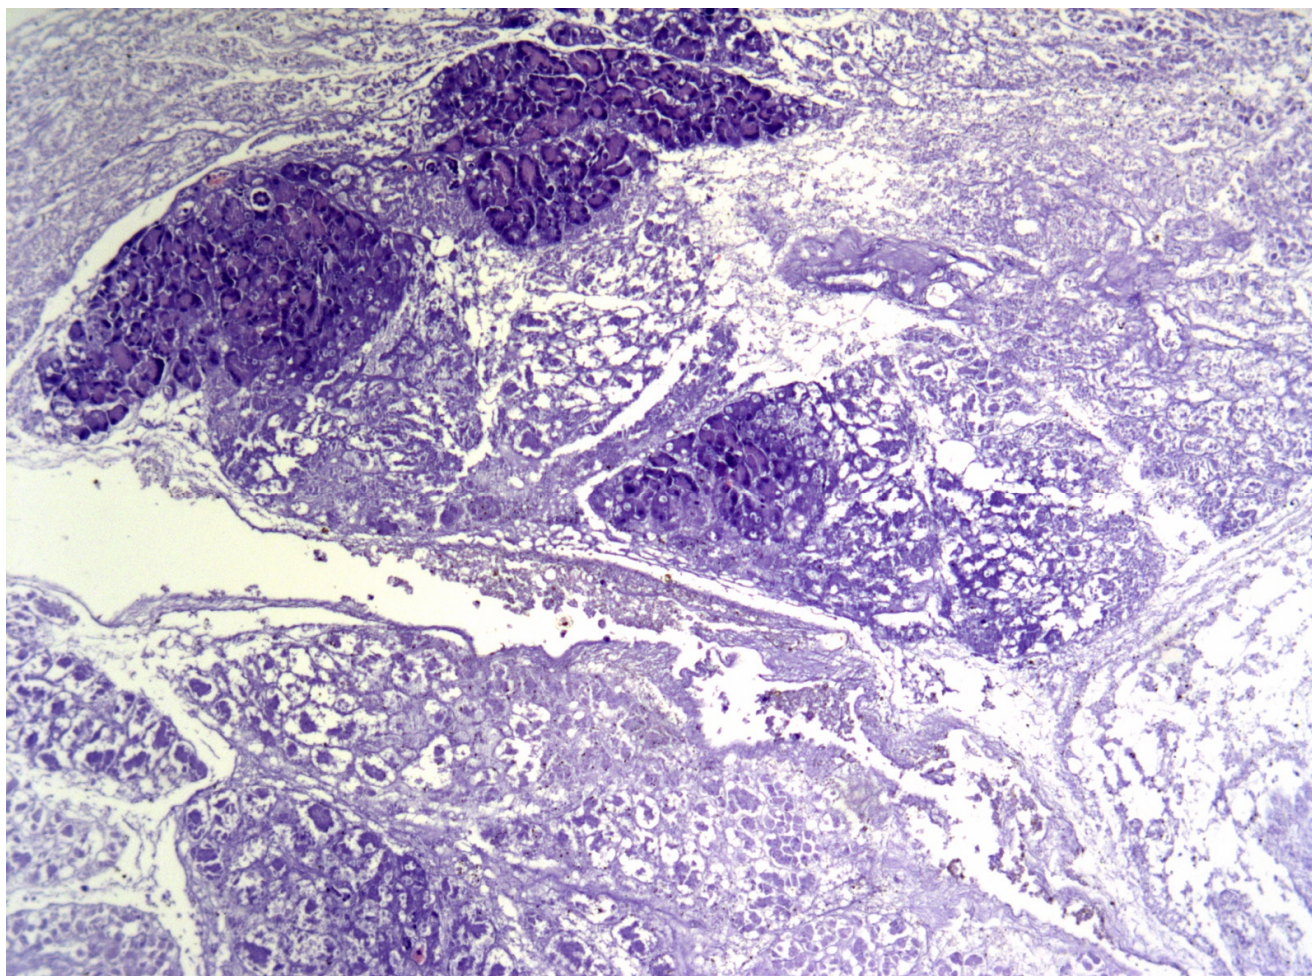

Supplementary Figure 4e

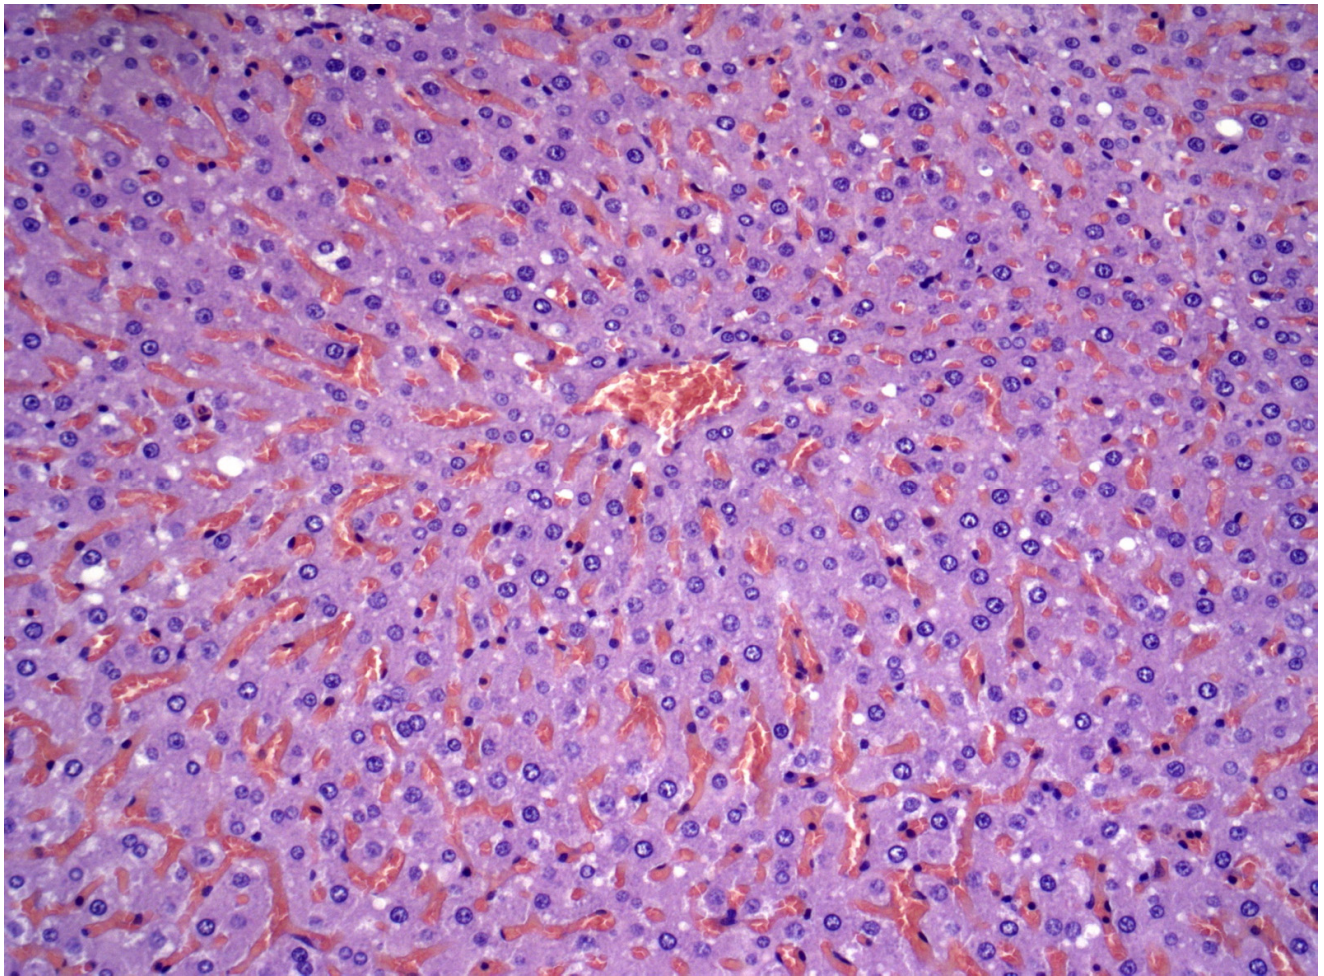

Supplementary Figure 4f

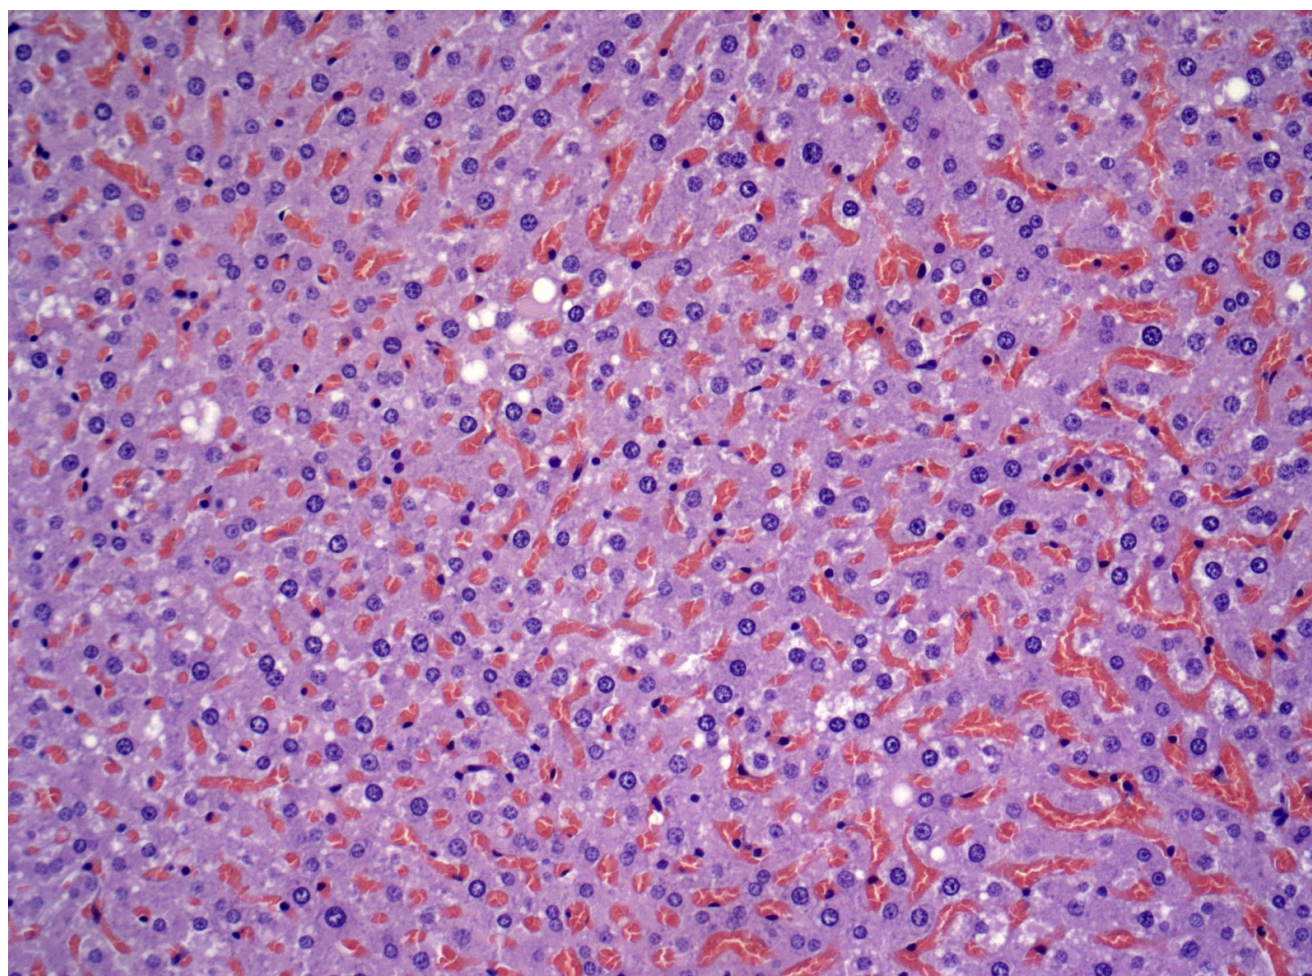

Supplementary Figure 4g
